# Supplementary material
Source: publisher figshare collection journal article supplement (https://frontiersin.figshare.com/ndownloader/files/15670421)
Supplement: Supplementary file [file 15670421]

Table S1 | Overview of selected studies

This table is supplemental material for the following article: Wolters F, Peerdeman KJ and Evers AWM (2019) Placebo and Nocebo Effects Across Symptoms: From Pain to Fatigue, Dyspnea, Nausea and Itch. Front. Psychiatry 10:470. doi: 10.3389/fpsy.2019.00470

| Author                   | P/N | N   | Population                                   | Sensation evocation                               | Placebo type                                  | Verbal suggestion                                                                        | Conditioning procedure                       | Control condition                                                                           | Self-report measures                                                                                                                                                                                    | Behavioral/physiological/neurological measures                                                                                                                                                     |
|--------------------------|-----|-----|----------------------------------------------|---------------------------------------------------|-----------------------------------------------|------------------------------------------------------------------------------------------|----------------------------------------------|---------------------------------------------------------------------------------------------|---------------------------------------------------------------------------------------------------------------------------------------------------------------------------------------------------------|----------------------------------------------------------------------------------------------------------------------------------------------------------------------------------------------------|
| <b>Fatigue</b>           |     |     |                                              |                                                   |                                               |                                                                                          |                                              |                                                                                             |                                                                                                                                                                                                         |                                                                                                                                                                                                    |
| Kalasountas et al., 2007 | P   | 42  | Healthy, 7%F                                 | Weight lifting, 2 trials 1 day apart              | Milk-sugar tablets                            | Told tablets contained amino acids with immediate strength effects                       | None                                         | Baseline trials (within). Placebo on first trial but not on second, or no placebo at either | Interview. 56 - 75% expected positive effects, felt invigorated after placebo, felt better between trial days, and disappointed/less effective when placebo was canceled                                | Increase in max lift weight that disappeared when placebo did or increased further with second placebo                                                                                             |
| McClung et al., 2007     | P   | 16  | Athletes, 33%F                               | 1 km time trial                                   | Drink solution                                | Told active treatment (sodium bicarbonate) plus additive that would prevent side effects | None                                         | Told additive only*                                                                         | Lower RPE in the told drug conditions                                                                                                                                                                   | Lower blood lactate levels in the drug groups, shorter total time in told drug groups                                                                                                              |
| Pollo et al., 2008       | P   | 44  | Healthy, 0%F                                 | Leg extensions until exhaustion                   | Decaffeinated coffee                          | Presented as strong coffee                                                               | Surreptitious weight reduction               | Decaffeinated coffee presented as such. Weight as experimental                              | Lower RPE only in VS+ conditioning group                                                                                                                                                                | Higher muscle work in VS group, even higher in VS + conditioning group                                                                                                                             |
| Duncan et al., 2009      | P   | 12  | Healthy, 0%F                                 | Single-leg leg extensions                         | Sweetened water                               | Told caffeine, given literature about the positive effects of caffeine on performance    | None                                         | Told placebo and consumed nothing conditions (within)                                       | Higher RPE in told placebo condition compared to control and told caffeine conditions                                                                                                                   | Higher weight lifted and more repetitions performed in the told caffeine condition compared to other conditions. No effect on cardiovascular measures                                              |
| Duncan, 2010             | P   | 12  | Athletes, moderate caffeine users, 0%F       | Wingate test on cycle ergometer                   | Sweetened water                               | Told caffeine, given literature about the positive effects of caffeine on performance    | None                                         | Told placebo*                                                                               | Lower RPE in placebo caffeine group compared to the told placebo group                                                                                                                                  | Higher peak power output in placebo caffeine compared to told placebo. No differences in mean power output, fatigue index, peak blood lactate, or peak heart rate                                  |
| Pollo et al., 2012       | N   | 67  | Healthy, 0%F                                 | Leg extensions until exhaustion                   | Sham electrical stimulation                   | Told electrical stimulation would increase fatigue                                       | Surreptitious weight increase                | No sham stimulation. Weight as experimental                                                 | No differences in RPE                                                                                                                                                                                   | Lower muscle work from VS (exp1) and VS + conditioning (exp2), but no difference between VS and VS + conditioning                                                                                  |
| Bottoms et al., 2014     | B   | 12  | Healthy, 0%F                                 | Arm crank until exhaustion                        | Sugar-free drink                              | Drinks described as ‘sports performance’ or ‘fatigue inducing’                           | None                                         | Given water (within)                                                                        | Lower RPE in placebo and higher RPE in nocebo condition. Higher expectancies in placebo and nocebo groups. Expectancies related to performance                                                          | Higher performance in placebo group vs control, no difference between nocebo vs control. No differences on cardio-respiratory, muscle and blood lactate measures.                                  |
| Fiorio et al., 2014      | P   | 60  | Healthy, 48%F                                | Single finger piston press                        | Sham TENS                                     | Described as effective treatment for enhancing force production                          | Surreptitious cursor excursion amplification | No TENS or told TENS in ineffective                                                         | Higher expectations and judgement of effectiveness in VS + conditioning group. Higher rating of effectiveness and force expenditure lower in VS group. Only a difference between control groups on RPE. | Higher force in VS + conditioning group and lower in control groups vs baseline. More neural activity in the relevant part of the motor cortex in experimental groups                              |
| Peerdeman et al., 2015   | P   | 116 | Healthy, 71%F                                | 10 min submaximal bicycle test                    | Placebo capsule                               | Told reduced sensitivity to physical sensations, effective in 95% of users               | None                                         | "effective in 5% of users"                                                                  | No differences in intensity or unpleasantness ratings                                                                                                                                                   | No differences in heart rate or skin conductance                                                                                                                                                   |
| Piedimonte et al., 2015  | P   | 30  | Healthy, right-handed, 47%F                  | Finger flexation for 30 min                       | Decaffeinated coffee                          | Presented as strong coffee                                                               | None                                         | No substance given                                                                          | Lower RPE in placebo group vs control                                                                                                                                                                   | Lower readiness potential on EEG                                                                                                                                                                   |
| Tolusso et al., 2015     | P   | 10  | Healthy, 0%F                                 | Running-based anaerobic sprint test on treadmill  | Water with "water enhancer"                   | Brochure on positive research results on the substance                                   | None                                         | Water condition (within)                                                                    | Lower pain in the placebo condition. No effect on RPE.                                                                                                                                                  | Higher peak and mean power in the last set on day 2, but not at any other time. No differences in metabolism                                                                                       |
| Tallis et al., 2016      | P   | 11  | Healthy, 0% F                                | Knee extend and flex of the dominant leg (40x)    | Sweetened water                               | Told caffeine, given literature about the positive effects of caffeine on performance    | None                                         | Told placebo, given caffeine or given caffeine and told placebo (within)                    | No differences in pain perception. Expectation not or negatively (1 measure) related to performance                                                                                                     | No differences in performance                                                                                                                                                                      |
| Brietzke et al., 2017    | P   | 9   | Healthy, 7%F                                 | Cycling maximal incremental test until exhaustion | Sucrose capsule                               | Described as caffeine                                                                    | None                                         | Given actual caffeine or no substance                                                       | No differences in RPE                                                                                                                                                                                   | No differences in maximal oxygen update. Higher time to exhaustion and peak power output in placebo and caffeine conditions vs no substance; no differences between placebo and caffeine           |
| Broelz et al., 2018      | P   | 34  | Athletes, 0%F                                | 45 min cycle ergometer time trial                 | Either salient pudding or nonsalient capsules | Told 50/50 chance of placebo or actual ergogenic supplement                              | None                                         | Given nothing                                                                               | No differences in RPE                                                                                                                                                                                   | Higher blood lactate in salient placebo group vs control and nonsalient placebo groups. Higher power output in both placebo groups. No difference for believing to be in the placebo or real group |
| Fletcher et al., 2018    | N   | 40  | 8 symptomatic (50%F), 32 asymptomatic (47%F) | Sustained attention response task                 | VS only                                       | Suggestion of ultrasonic sound                                                           | None                                         | Actual ultrasonic sound, told unknown if sound, or told no sound                            | No differences in self-reported fatigue or nausea. Higher ear pain and dizziness in asymptomatic group and tinnitus in symptomatic group                                                                | Higher galvanic skin response in US present vs US absent cue only in asymptomatic group                                                                                                            |
| Fanti-Oren et al., 2019  | P   | 24  | Children age 9-11 av., 50%F                  | Treadmill exercise stress test                    | Water drink                                   | Described as increasing energy level, muscle strength and exercise performance           | None                                         | Described as water (within)                                                                 | Lower average and peak RPE in placebo condition                                                                                                                                                         | Higher peak heart rate, higher exercise test stage achieved, longer time to exhaustion and shorter recovery time in placebo condition                                                              |
| <b>Dyspnea</b>           |     |     |                                              |                                                   |                                               |                                                                                          |                                              |                                                                                             |                                                                                                                                                                                                         |                                                                                                                                                                                                    |
| Isenberg et al., 1992    | B   | 33  | Asthmatics, 7%F                              | 3 inhalers, baseline - constrictor - dilator      | Placebo inhaler                               | Described as bronchoconstrictor or bronchodilator ('strong but shortlived' effects)      | None                                         | Baseline measure (within)                                                                   | Higher asthma symptoms after constrictor and lower after dilator                                                                                                                                        | No effect on FEV1 or later measures                                                                                                                                                                |

|                            |   |    |                                                                    |                                                             |                                               |                                                                                                                    |                                    |                                                              |                                                                                                                                                                                             |                                                                                                                                                                                           |
|----------------------------|---|----|--------------------------------------------------------------------|-------------------------------------------------------------|-----------------------------------------------|--------------------------------------------------------------------------------------------------------------------|------------------------------------|--------------------------------------------------------------|---------------------------------------------------------------------------------------------------------------------------------------------------------------------------------------------|-------------------------------------------------------------------------------------------------------------------------------------------------------------------------------------------|
| Van den Bergh et al., 1995 | N | 28 | Healthy, 50%F                                                      | Breathing mask                                              | Scented air with 0% CO2                       | Told minor transient complaints could appear while breathing both odors                                            | Scent associated with 7.4% CO2     | Nonassociated scent (within)                                 | Higher self-reported respiratory complaints after conditioning, but only for the unpleasant scent                                                                                           | Higher breathing frequency after conditioning, but only for the unpleasant scent                                                                                                          |
| Van den Bergh et al., 1997 | N | 28 | Psychosomatic patients, 50%F                                       | Breathing mask                                              | Scented air with 0% CO2                       | Told minor transient complaints could appear while breathing both odors                                            | Scent associated with 7.4% CO2     | Nonassociated scent (within)                                 | Higher self-reported respiratory complaints after conditioning, but only for the unpleasant scent                                                                                           | Higher heart rate and breathing frequency after conditioning                                                                                                                              |
| Van den Bergh et al., 1998 | N | 56 | Healthy, 50%F                                                      | Breathing mask                                              | Scented air with 0% CO2                       | Told minor transient complaints could appear while breathing both odors                                            | Scent associated with 7.4% CO2     | Nonassociated scent (within)                                 | Higher self-reported respiratory complaints after conditioning, but only for the unpleasant scent                                                                                           | No effect on respiratory responses or heart rate                                                                                                                                          |
| Van den Bergh et al., 1999 | N | 64 | Healthy, 75%F                                                      | Breathing mask                                              | Scented air with 0% CO2                       | Told minor transient complaints could appear while breathing both odors                                            | Scent associated with 7.4% CO2     | Nonassociated scent (within)                                 | Higher self-reported respiratory complaints after conditioning                                                                                                                              | Higher breathing frequency (but no other respiratory measures) after conditioning, but only for ammonia                                                                                   |
| Devriese et al., 2000      | N | 56 | Healthy, 59%F                                                      | Breathing mask                                              | Scented air with 0% CO2                       | Told minor transient complaints could appear while breathing both odors                                            | Scent associated with 7.4% CO2     | Nonassociated scent (within)                                 | Higher self-reported respiratory complaints after conditioning                                                                                                                              | No effects on respiratory behavior                                                                                                                                                        |
| Leigh et al., 2003         | N | 17 | Asthmatics, 8 suggestible (75%F) and 9 suggestion-resistant (56%F) | Saline inhaler                                              | Saline inhaler                                | Told bronchoconstrictor/could cause wheezing/chest tightness (first), told bronchodilator (second)                 | None                               | Baseline and actual metacholine challenge                    | No difference in dyspnea after sham bronchoconstrictor. Correlation between dyspnea increase in sham and metacholine conditions in suggestible but not suggestion-resistant group           | 5 suggestible vs 1 nonsuggestible participant showed reduced FEV-1 in the constrictor phase. No effects for the dilator phase                                                             |
| Put et al., 2004           | B | 32 | Asthmatics, 7%F                                                    | Inhale twice for each inhaler, test - constrictor - dilator | Placebo inhaler                               | Described as bronchoconstrictor or bronchodilator ('strong but shortlived' effects)                                | None                               | Placebo inhaler described as practice/just air (within)      | Lower symptoms after bronchodilator. No effect for bronchoconstrictor. No effects for social desirability.                                                                                  | No effect on lung function measures                                                                                                                                                       |
| De Peuter et al., 2005     | N | 38 | 50% asthmatics and 50% healthy, 50%F                               | 6 2-minute rebreathing trials + two test trials             | Placebo inhaler                               | Both substances described as possibly having short-lasting effects on airways                                      | Inhaler coupled with high (5%) CO2 | Other inhaler coupled with pure oxygen (within)              | Higher symptom expectancies and subjective symptom ratings in test phase for CO2-associated inhaler for both groups. Expectancy correlated with symptom scores only in the asthmatic group. | Higher respiratory drive in test trials with CO2-associated inhaler for both groups; no difference on other respiratory measures                                                          |
| De Peuter et al., 2007     | N | 30 | Asthmatics, 73%F                                                   | Histamine inhalation + test trials with saline              | Saline inhaler                                | None                                                                                                               | Histamine provocation              | Baseline (within)                                            | Higher ratings of obstruction and fatigue (but not dyspnea) after saline inhaler.                                                                                                           | No difference in lung function                                                                                                                                                            |
| Kemeny et al., 2007        | P | 50 | Asthmatics, 56%F                                                   | Inhaler before methacholine challenge                       | Placebo inhaler                               | "You shouldn't have any symptoms"                                                                                  | None                               | Baseline (within)                                            | None                                                                                                                                                                                        | Improved airway reactivity (PC20) after placebo vs baseline. No correlations between placebo response and social desirability, positivity, NA, physician attitude                         |
| Fannes et al., 2008        | N | 56 | Healthy, 52%F                                                      | Breathing mask                                              | Scented room air                              | Told minor transient complaints could appear while breathing one odor                                              | Scent associated with 20% CO2      | Nonassociated scent (within)                                 | None                                                                                                                                                                                        | Higher ventilation that reduced with increased trials                                                                                                                                     |
| Meulders et al., 2010      | N | 56 | Same as Fannes et al. (2008)                                       | Breathing mask                                              | Scented room air                              | Told minor transient complaints could appear while breathing one odor                                              | Scent associated with 20% CO2      | Nonassociated scent (within)                                 | Higher respiratory complaints only in good predictors for one of the odors                                                                                                                  | None                                                                                                                                                                                      |
| Wechsler et al., 2011      | P | 39 | Asthmatics, 80%F                                                   | None                                                        | Placebo inhaler (blinded) or sham acupuncture | Neutral double blind instructions                                                                                  | None                               | Active treatment with albuterol and no intervention (within) | Lower asthma symptoms for all intervention conditions vs no intervention. No difference between active treatment and both placebo conditions.                                               | No difference between the two placebo conditions and control on FEV1 . Higher FEV1 in alburterol vs control                                                                               |
| Jaén et al., 2014          | B | 17 | Asthmatics, 47%F                                                   | Odour in one nostril through olfactometer                   | Odor only                                     | "some people have reported produced mild respiratory problems" or "some people have described them breathe better" | None                               | Baseline measure (within)                                    | Higher irritating and annoying scores in harmful odor group vs helpful group. No differences in asthma symptoms                                                                             | No differences in FEV1, etCO2 and respiratory rate. No differences in heart rate or variability. Increased airway inflammation in the harmful odor group, at 0, 2 and 24 h after exposure |

**Nausea**

|                            |   |    |                                                          |                                              |                                 |                                                                                                        |                                                                        |                                                                                  |                                                                                                                                                                                             |                                                                                                                                           |
|----------------------------|---|----|----------------------------------------------------------|----------------------------------------------|---------------------------------|--------------------------------------------------------------------------------------------------------|------------------------------------------------------------------------|----------------------------------------------------------------------------------|---------------------------------------------------------------------------------------------------------------------------------------------------------------------------------------------|-------------------------------------------------------------------------------------------------------------------------------------------|
| Stockhorst et al., 1998    | P | 16 | Cancer patients receiving chemotherapy, 50%F             | Chemotherapy infusion                        | Conditioning only               | Conditioning only                                                                                      | Overshadowing with strong-tasting drink                                | Given water                                                                      | Lower number of patients reported anticipatory nausea in overshadowing group. Lower duration and higher latency of post-infusion nausea in overshadowing group.                             | More vagal activity in control vs overshadowing group                                                                                     |
| Klosterhalfen et al., 2000 | N | 29 | Motion sickness susceptible, 54%F                        | Rotation chair with vertical head movement   | Conditioning only               | Conditioning only                                                                                      | Stongly favored drink just before rotation                             | Water just before rotation                                                       | Higher anticipatory nausea in conditioned group. No differences in pre or post rotation nausea                                                                                              | Lower strong-tasting drink consumption in conditioned group. No effect on rotation tolerance or hormone levels                            |
| Williamson et al., 2004    | B | 80 | 50%F, either low or high motion sickness susceptible     | Rotating optokinetic drum or non-moving drum | VS only                         | Told to either expect motion sickness or pleasant sensations                                           | None                                                                   | None                                                                             | No difference between high and low expectation groups in motion sickness                                                                                                                    | Higher abnormal gastric activity in the low expectation group than the high expectation group                                             |
| Klosterhalfen et al., 2005 | P | 24 | Healthy, 50%F                                            | Rotation chair with vertical head movement   | Conditioning only               | Conditioning only                                                                                      | Latent inhibition with pre-exposure to rotation chair, 3 or 1 sessions | No pre-exposure to rotation chair                                                | Lower anticipatory nausea in pre-exposure groups vs control at test. No differences during learning. Higher nausea and more reduction due to latent inhibition in women vs men              | No group differences in rotation tolerance on days 3 and 4                                                                                |
| Levine et al., 2006        | B | 75 | Healthy, 27%F                                            | Rotating optokinetic drum                    | Placebo pill                    | Tested motion sickness medication or experimental motion sickness medication that could enhance nausea | None                                                                   | Placebo pill described as placebo                                                | Lower nausea in the nocebo group. No difference between placebo and control                                                                                                                 | Lower gastric tachyarrhythmia (measured by EGG) in the nocebo group during drum rotation. No difference between placebo and control group |
| Klosterhalfen et al., 2009 | N | 96 | Motion sickness susceptible, 50%F, 48 in each experiment | Rotation chair with vertical head movement   | Listerine Cinnamon breath strip | Told stimulus (breath strip) can worsen motion sickness (experiment 2 only)                            | Given breath strip two times before (experiment 1 only)                | Given breath strip hours after rotation (exp 1); no information provided (exp 2) | Anticipatory nausea higher in conditioning group in women in exp 1. Post-rotation nausea higher in conditioning group and even higher in women in exp 1. No differences in nausea in exp 2. | Lower rotation tolerance in women after conditioning in exp 1 and in men after suggestion in exp 2                                        |

|                                    |   |     |                                                        |                                               |                                                                                   |                                                                                                                             |                                                                                                       |                                                                                                |                                                                                                                                                                                            |                                                                                                                                                                                                                                                                                                  |
|------------------------------------|---|-----|--------------------------------------------------------|-----------------------------------------------|-----------------------------------------------------------------------------------|-----------------------------------------------------------------------------------------------------------------------------|-------------------------------------------------------------------------------------------------------|------------------------------------------------------------------------------------------------|--------------------------------------------------------------------------------------------------------------------------------------------------------------------------------------------|--------------------------------------------------------------------------------------------------------------------------------------------------------------------------------------------------------------------------------------------------------------------------------------------------|
| Weimer et al., 2012                | P | 64  | Healthy, 50%F                                          | Rotation chair with vertical head movement    | Placebo pill                                                                      | Told ginger pill                                                                                                            | None                                                                                                  | Told placebo*                                                                                  | No differences in nausea symptom ratings. Symptom ratings and expectancy ratings did not affect any other results. Lower expectancies in told ginger conditions                            | No differences between groups for the number of rotations or head movements or rotation time. No differences in EGG activity                                                                                                                                                                     |
| Horing et al., 2013 (experiment 2) | P | 32  | Motion sickness susceptible, 50%F                      | Rotation chair with vertical head movement    | 100 ml water with lemon aroma                                                     | Told antiemetic medication (ginger solution)                                                                                | Surreptitious rotation speed decrease                                                                 | Told water                                                                                     | Lower maximum nausea symptoms in placebo group                                                                                                                                             | Higher rotation tolerance and higher number of head movements in placebo group. No differences in EGG activity                                                                                                                                                                                   |
| Schientle et al., 2014             | P | 34  | Right-handed, 50%F, at least average disgust proneness | Watching disgusting pictures in fMRI          | Silica capsule                                                                    | Herbal medicine used to treat digestive problems and fever which would reduce nausea                                        | None                                                                                                  | Not given any substance (other day, within)                                                    | Lower disgust rating for disgusting pictures in placebo vs control condition                                                                                                               | Lower left insula activity in placebo vs control condition; difference correlated with the reduction in disgust ratings. Higher amygdala-DMPFC coactivation in placebo condition                                                                                                                 |
| Stockhorst et al., 2014            | P | 24  | Healthy, 50%F                                          | Rotation chair with vertical head movement    | Conditioning only                                                                 | Conditioning only                                                                                                           | Overshadowing with strong-tasting beverage                                                            | Given water in all sessions                                                                    | Lower anticipatory nausea in overshadowing group vs control. No difference in post-rotation nausea                                                                                         | No group differences in cortisol and TNF-alpha. Lower cortisol and TNF-alpha in women, but higher in men, in overshadowing group vs control                                                                                                                                                      |
| Hall et al., 2015                  | P | 32  | Healthy, 100%F                                         | Rotation chair with vertical head movement    | Conditioning only                                                                 | Conditioning only                                                                                                           | Latent inhibition (pre-exposure to rotation setting), overshadowing (strong-tasting beverage) or both | No pre-exposure (early sessions in a neutral office context) and drank water                   | No difference in anticipatory nausea. Test session nausea higher in latent inhibition group and lower in overshadowing group compared to control, but only when not corrected for baseline | Higher cortisol levels in latent inhibition group vs overshadowing group. No differences for other groups                                                                                                                                                                                        |
| Quinn et al., 2015                 | N | 30  | Healthy, 53%F                                          | Galvanic vestibular stimulation               | Inactive (monopolar) GVS                                                          | Told device may temporarily cause low levels of nausea                                                                      | Earlier active (bipolar) GVS trials                                                                   | Earlier trials were also inactive (monopolar)                                                  | Higher nausea for the conditioned groups than control. No effect for context change                                                                                                        | None                                                                                                                                                                                                                                                                                             |
| Müller et al., 2016                | P | 21  | Motion sickness susceptible, 100%F                     | Rotation black and white stripes presentation | Sham TENS accupuncture                                                            | Told 50/50 chance active TENS accupuncture                                                                                  | None                                                                                                  | Natural history condition (within)                                                             | Lower nausea increase and nausea expectation in placebo vs natural history group                                                                                                           | None                                                                                                                                                                                                                                                                                             |
| Quinn et al., 2016                 | P | 56  | Healthy, 57%F                                          | Galvanic vestibular stimulation               | Peppermint vapor (either on day 2 for conditioning groups or 3 for VS only group) | Told vapor reduced nausea (on day 2 in the combined group and day 3 in the VS only group)                                   | Low intensity GVS on day 2                                                                            | Received vapor on day 3 with no instructions                                                   | Higher nausea symptoms in both VS and conditioning groups. VS effective for men but not for women, conditioning for women but not for men.                                                 | None                                                                                                                                                                                                                                                                                             |
| Quinn et al., 2017                 | B | 90  | Healthy, 53%F                                          | Galvanic verstibular stimulation              | Inactive (monopolar) GVS                                                          | Told device may temporarily cause low levels of nausea                                                                      | Earlier active (bipolar) GVS trials or additional pre-exposure with inactive GVS                      | Earlier trials were also inactive (monopolar)                                                  | Higher nausea in conditioned groups. Lower nausea in pre-exposure group. Expectancies related to nausea increase, but not decrease                                                         | None                                                                                                                                                                                                                                                                                             |
| Schientle et al., 2017             | P | 45  | Right-handed, healthy, 100%F                           | Watching disgusting pictures in fMRI          | Silica capsule                                                                    | Homeopathic medicine able to reduce disgust-related symptoms, effective in previous study                                   | None                                                                                                  | Neutral pictures, passive viewing condition (both within)                                      | Lower disgust ratings for disgust pictures in the placebo vs control condition                                                                                                             | Lower insula and DLPFC activity in placebo vs control. Lower connectivity between left insula and right amygdala/right insula, lower connectivity between right DLPFC and right amygdala, and higher connectivity between bilateral amygdala and left orbitofrontal cortex in placebo vs control |
| Weimer et al., 2017                | P | 48  | Healthy, 50% female                                    | Rotation chair with vertical head movement    | Colored and flavored water drops                                                  | Told antiemetic medication (ginger solution), either 50% or 100% chance                                                     | None                                                                                                  | Told water; baseline rotation without placebo (within)                                         | Lower symptoms in both VS groups vs control, in women only. No difference between VS groups. No effect of expectations or individual moderators                                            | No group differences in increase in rotation tolerance or decrease in EGG ratio                                                                                                                                                                                                                  |
| Fletcher et al., 2018              | N | 40  | 8 symptomatic (50%F), 32 asymptomatic (47%F)           | Sustained attention response task             | VS only                                                                           | Suggestion of ultrasonic sound                                                                                              | None                                                                                                  | Actual ultrasonic sound, told unknown if sound, or told no sound                               | No differences in fatigue or nausea. Higher ear pain and dizziness in asymptomatic group and tinnitus in symptomatic group                                                                 | Higher galvanic skin response in US present vs US absent cue only in asymptomatic group                                                                                                                                                                                                          |
| <b><i>Itch</i></b>                 |   |     |                                                        |                                               |                                                                                   |                                                                                                                             |                                                                                                       |                                                                                                |                                                                                                                                                                                            |                                                                                                                                                                                                                                                                                                  |
| Scholz et al. 1994                 | B | 30  | AD patients, ?%F                                       | Histamine skin prick                          | VS only                                                                           | Instruction that exaggerated the possible skin reaction                                                                     | None                                                                                                  | "instruction that played down the potential reaction"                                          | Higher itch ratings in exaggerated suggestion group than downplayed suggestion group                                                                                                       | Higher skin reactions in exaggerated suggestion group than downplayed suggestion group                                                                                                                                                                                                           |
| van Laarhoven et al., 2011         | B | 105 | Healthy, 100%F                                         | Mechanical or electrical stimulation          | VS only                                                                           | Told 95% experience itch and 5% experience pain or vv (part 1); told nearly all don't experience itch/pain anymore (part 2) | None                                                                                                  | Told hardly anyone experiences pain or itch (part 1) or same instruction as in part 1 (part 2) | Higher itch in nocebo vs control condition. No difference in placebo vs control condition in part 2. Expectancies correlated with nocebo effect                                            | None                                                                                                                                                                                                                                                                                             |
| Bartels et al., 2014               | B | 95  | Healthy, 77%F                                          | Electrical stimulation                        | Sham electrode                                                                    | Told color cue indicated intensity change                                                                                   | Pairing of color cue with different intensity stimulation                                             | No information given, intensity was independent of color cue                                   | Higher symptom scores in nocebo trials and lower in placebo trials vs control trials for VS + conditioning group, but not for VS or conditioning groups                                    | None                                                                                                                                                                                                                                                                                             |
| Darragh et al., 2015               | P | 48  | Healthy, 79%F                                          | Histamine prick                               | Inert aqueous cream                                                               | Presented as antihistamine treatment cream                                                                                  | None                                                                                                  | Presented as control cream (within)                                                            | Lower itch in placebo condition at one, three and five minutes but not at seven minutes                                                                                                    | No difference in weal size                                                                                                                                                                                                                                                                       |
| Napadow et al., 2015               | N | 14  | AD patients, 57%F                                      | Histamine prick with thermal modulation       | Water drop                                                                        | None given, but expected to be histamine due to earlier exposure to procedure                                               | None                                                                                                  | Histamine and neutral conditions (within)                                                      | Higher itch in nocebo vs neutral. Increases in itch during nocebo trials correlated with levels of placebo-induced itch reduction                                                          | Higher activity in DLPFC, caudate, and intraparietal sulcus in nocebo vs neutral                                                                                                                                                                                                                 |

|                          |   |     |                              |                                                            |                              |                                                                                                             |                                                                               |                                                                       |                                                                                                                                                                                                                                           |                                                                                                                                                                                                |
|--------------------------|---|-----|------------------------------|------------------------------------------------------------|------------------------------|-------------------------------------------------------------------------------------------------------------|-------------------------------------------------------------------------------|-----------------------------------------------------------------------|-------------------------------------------------------------------------------------------------------------------------------------------------------------------------------------------------------------------------------------------|------------------------------------------------------------------------------------------------------------------------------------------------------------------------------------------------|
| Peerdeman et al., 2015   | P | 116 | Healthy, 71%F                | Histamine iontophoresis                                    | Placebo capsule              | Told reduced sensitivity to physical sensations, effective in 95% of users                                  | None                                                                          | "effective in 5% of users"                                            | No differences in intensity or unpleasantness ratings                                                                                                                                                                                     | No differences between groups in heart rate or skin conductance                                                                                                                                |
| Schut et al., 2016       | N | 120 | 50% AD patients, 50% healthy | Watching itch-inducing video (lecture on crawling insects) | Video only                   | Told videos would induce itch (informed group) or would definitely cause awful itch (catastrophizing group) | None                                                                          | No information about upcoming video (between); control video (within) | None                                                                                                                                                                                                                                      | Higher scratching duration in catastrophizing and uninformed groups as compared to informed group, but only in AD patients                                                                     |
| Stumpf et al., 2016      | N | 100 | Healthy, 50%F                | Histamine prick and sodium chloride prick                  | VS only                      | "I'm going to inject you with a small quantity of a substance that causes an enormous itch in most people"  | None                                                                          | Neutral suggestion, more mild suggestion ("some itch")                | Higher itch intensity and unpleasantness ratings in nocebo vs control for sodium chloride, but no effect on urge to scratch. Higher itch intensity in nocebo vs control for histamine, but no effect on unpleasantness or urge to scratch | Higher weal, but not flare size in nocebo sodium chloride condition. Higher flare, but not wheal size in nocebo histamine condition                                                            |
| Bartels et al., 2017     | B | 129 | Healthy, 78.7%F              | Electrical stimulation                                     | Sham electrode               | Told color cue indicated intensity change                                                                   | Pairing of color cue with different intensity stimulation                     | Conditioning and extinction groups (phase 2 only)                     | Higher itch in nocebo condition in phase 1. Effect increased by further conditioning, increased less by extinction, and reduced by counterconditioning in phase 2. Effects generalized to histamine itch in phase 3                       | Higher scratching behavior in learning trials, but not in test trials, both in phase 1 and phase 2 of the experiment (analysis from Bartels et al., 2018, using data from the same experiment) |
| Van de Sand et al., 2018 | N | 30  | Healthy, right-handed, 60%F  | Histamine patch with thermal modulation                    | Sham TENS                    | Told "subluminal TENS" had been shown to aggravate itch by experimenter in white lab coat                   | Surreptitious increase of histamine concentration and lowering of temperature | No histamine and told no TENS conditions (within)                     | Higher itch ratings in the nocebo condition vs histamine condition                                                                                                                                                                        | Itch related to right mid-posterior insula activity; nocebo itch related to activity in the contralateral rolandic operculum and PAG                                                           |
| Meeuwis et al., 2018     | P | 91  | Healthy, 81%F                | Histamine iontophoresis                                    | Open-label verbal suggestion | Told 95% of people experience little to no itch with this procedure; told about the effect of suggestion    | None                                                                          | No suggestion                                                         | Lower itch expectations in placebo condition, but not itch rating. Expectation related to itch in experimental group only. Higher positive affect in the experimental group, no difference in negative affect                             | No differences in weal or flare size or skin temperature                                                                                                                                       |
| Skvortsova et al., 2018  | P | 108 | Healthy, 100%F               | Histamine iontophoresis                                    | Nasal spray                  | Told oxytocin which decreases itch and pain sensitivity                                                     | None                                                                          | No suggestion*                                                        | Lower expectations after positive suggestion. No differences in itch intensity                                                                                                                                                            | None                                                                                                                                                                                           |

Note. P = placebo, N = nocebo, B = both placebo and nocebo, F = female, VS = verbal suggestion, TENS = transcutaneous electric nerve stimulation, RPE = rate of perceived exhaustion, GVS = galvanic vestibular stimulation, EGG = electrogastrogram, FEV1 = forced expiratory volume in 1 second, DLPFC = dorsolateral prefrontal cortex, PAG = periaqueductal grey

\*Balanced placebo design study. Apart from placebo and control group, also includes active treatment groups that either received the same suggestion as the placebo group or the same suggestion as the control group.
